# Supplementary material for: Efficacy of Fu's Subcutaneous Needling on Myofascial Trigger Points for Lateral Epicondylalgia: A Randomized Control Trial
Source: Evid Based Complement Alternat Med. 2022 Mar 14;2022:5951327. doi: 10.1155/2022/5951327 (PMC8938053; doi:10.1155/2022/5951327)
Supplement: Supplementary Materials — Video S1: procedure of FSN performed by a doctor. Video S2: swaying and wrist extension movement. [file 5951327.f1.zip]

Archive with 2 entries (2 files):
- Video S1.mp4
- Video S2.mp4
